# Supplementary material for: Anaerobic Soil Disinfestation Promotes Soil Microbial Stability and Antagonistic Bacteria Abundance in Greenhouse Vegetable Production Systems
Source: MDPI journal article supplement (doi:10.3390/agronomy13030939), 2023-03-22
Supplement: s1 [file s1]

## Supplementary

Table S1 The characteristics of empirical bacterial network structure constructed in studies

| <b>Network Indexes</b>                        | <b>CK</b> | <b>ASD</b> | <b>ASD+M</b> |
|-----------------------------------------------|-----------|------------|--------------|
| Total nodes                                   | 195       | 623        | 607          |
| Total links                                   | 172       | 832        | 814          |
| R square of power-law                         | 0.992     | 0.949      | 0.964        |
| Average degree (avgK)                         | 1.764     | 2.671      | 2.682        |
| Average clustering coefficient (avgCC)        | 0.103     | 0.115      | 0.119        |
| Average path distance (GD)                    | 4.105     | 7.659      | 7.997        |
| Geodesic efficiency (E)                       | 0.35      | 0.167      | 0.164        |
| Harmonic geodesic distance (HD)               | 2.853     | 6.006      | 6.107        |
| Maximal degree                                | 11        | 21         | 21           |
| Nodes with max degree                         | OTU5814   | OTU16268   | OTU15120     |
| Centralization of degree (CD)                 | 0.048     | 0.03       | 0.03         |
| Maximal betweenness                           | 718.017   | 21860.89   | 27827.898    |
| Nodes with max betweenness                    | OTU5814   | OTU5656    | OTU5052      |
| Centralization of betweenness (CB)            | 0.037     | 0.109      | 0.147        |
| Maximal stress centrality                     | 1635      | 142980     | 148429       |
| Nodes with max stress centrality              | OTU5814   | OTU12289   | OTU5052      |
| Centralization of stress centrality (CS)      | 0.085     | 0.712      | 0.786        |
| Maximal eigenvector centrality                | 0.396     | 0.358      | 0.374        |
| Nodes with max eigenvector centrality         | OTU11645  | OTU16268   | OTU15120     |
| Centralization of eigenvector centrality (CE) | 0.373     | 0.347      | 0.364        |
| Density (D)                                   | 0.009     | 0.004      | 0.004        |
| Reciprocity                                   | 1         | 1          | 1            |
| Transitivity (Trans)                          | 0.271     | 0.244      | 0.218        |
| Connectedness (Con)                           | 0.084     | 0.442      | 0.47         |
| Efficiency                                    | 0.931     | 0.993      | 0.994        |
| Hierarchy                                     | 0         | 0          | 0            |
| Lubness                                       | 1         | 1          | 1            |

Table S2 The characteristics of empirical fungal network structure constructed in studies

| <b>Network Indexes</b>                        | <b>CK</b> | <b>ASD</b> | <b>ASD+M</b> |
|-----------------------------------------------|-----------|------------|--------------|
| Total nodes                                   | 106       | 109        | 114          |
| Total links                                   | 195       | 194        | 203          |
| R square of power-law                         | 0.72      | 0.738      | 0.839        |
| Average degree (avgK)                         | 3.679     | 3.56       | 3.561        |
| Average clustering coefficient (avgCC)        | 0.232     | 0.234      | 0.243        |
| Average path distance (GD)                    | 4.973     | 4.732      | 4.692        |
| Geodesic efficiency (E)                       | 0.267     | 0.278      | 0.271        |
| Harmonic geodesic distance (HD)               | 3.751     | 3.602      | 3.684        |
| Maximal degree                                | 14        | 14         | 14           |
| Nodes with max degree                         | OTU791    | OTU333     | OTU791       |
| Centralization of degree (CD)                 | 0.1       | 0.098      | 0.094        |
| Maximal betweenness                           | 2212.997  | 1198.191   | 1335.314     |
| Nodes with max betweenness                    | OTU3338   | OTU1691    | OTU1492      |
| Centralization of betweenness (CB)            | 0.373     | 0.18       | 0.182        |
| Maximal stress centrality                     | 6713      | 2445       | 4997         |
| Nodes with max stress centrality              | OTU3338   | OTU2005    | OTU1492      |
| Centralization of stress centrality (CS)      | 1.127     | 0.357      | 0.675        |
| Maximal eigenvector centrality                | 0.308     | 0.361      | 0.369        |
| Nodes with max eigenvector centrality         | OTU1412   | OTU493     | OTU791       |
| Centralization of eigenvector centrality (CE) | 0.257     | 0.31       | 0.322        |
| Density (D)                                   | 0.035     | 0.033      | 0.032        |
| Reciprocity                                   | 1         | 1          | 1            |
| Transitivity (Trans)                          | 0.335     | 0.325      | 0.256        |
| Connectedness (Con)                           | 0.926     | 0.825      | 0.931        |
| Efficiency                                    | 0.972     | 0.97       | 0.975        |
| Hierarchy                                     | 0         | 0          | 0            |
| Lubness                                       | 1         | 1          | 1            |

(a) Bacteria

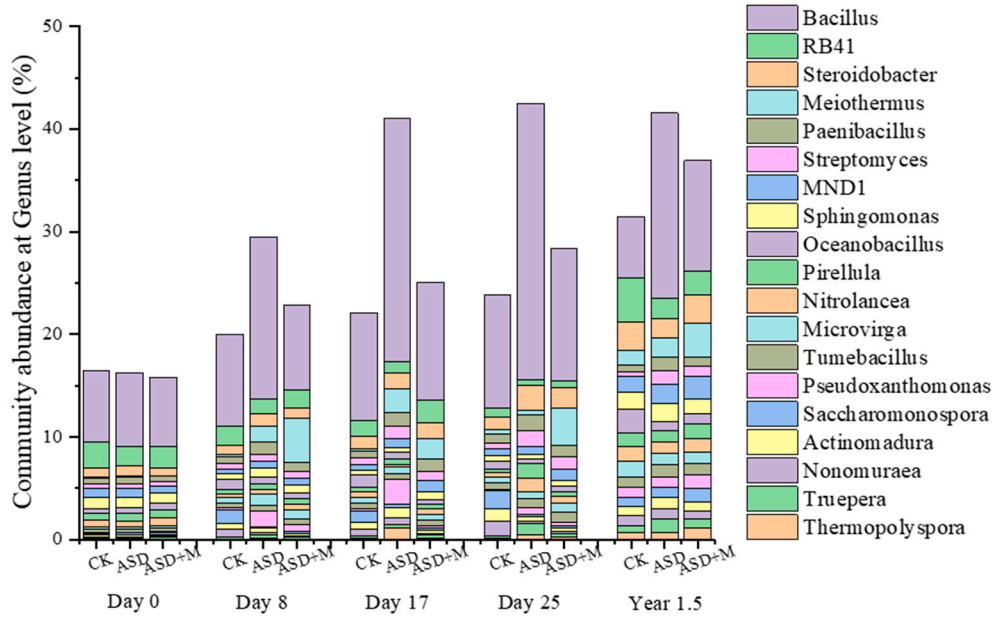

(b) Fungi

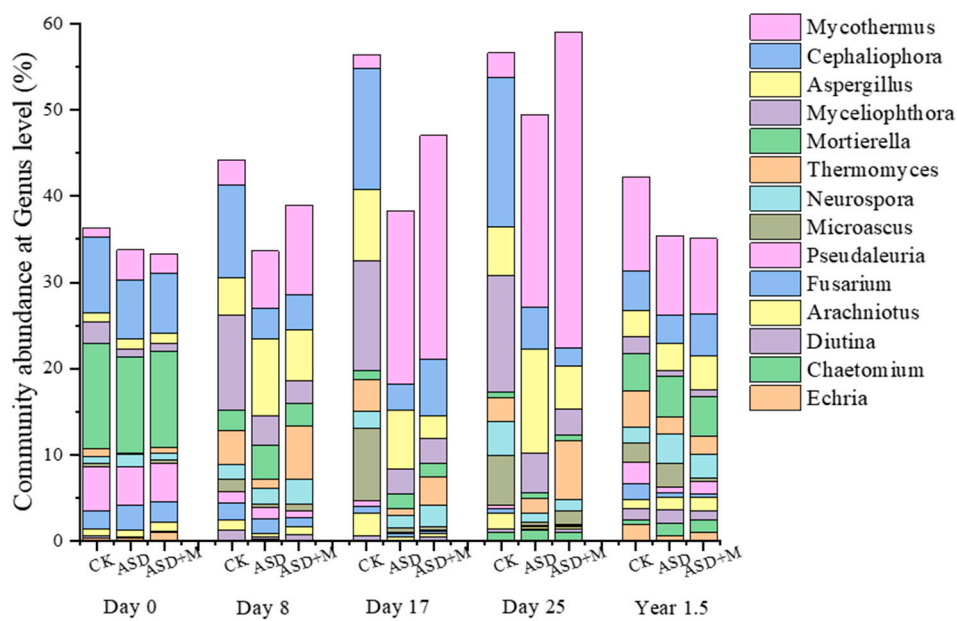

**Figure. S1** Soil bacterial (a) and fungal (b) community bar plot analysis under different treatments at the genus level (n = 6).

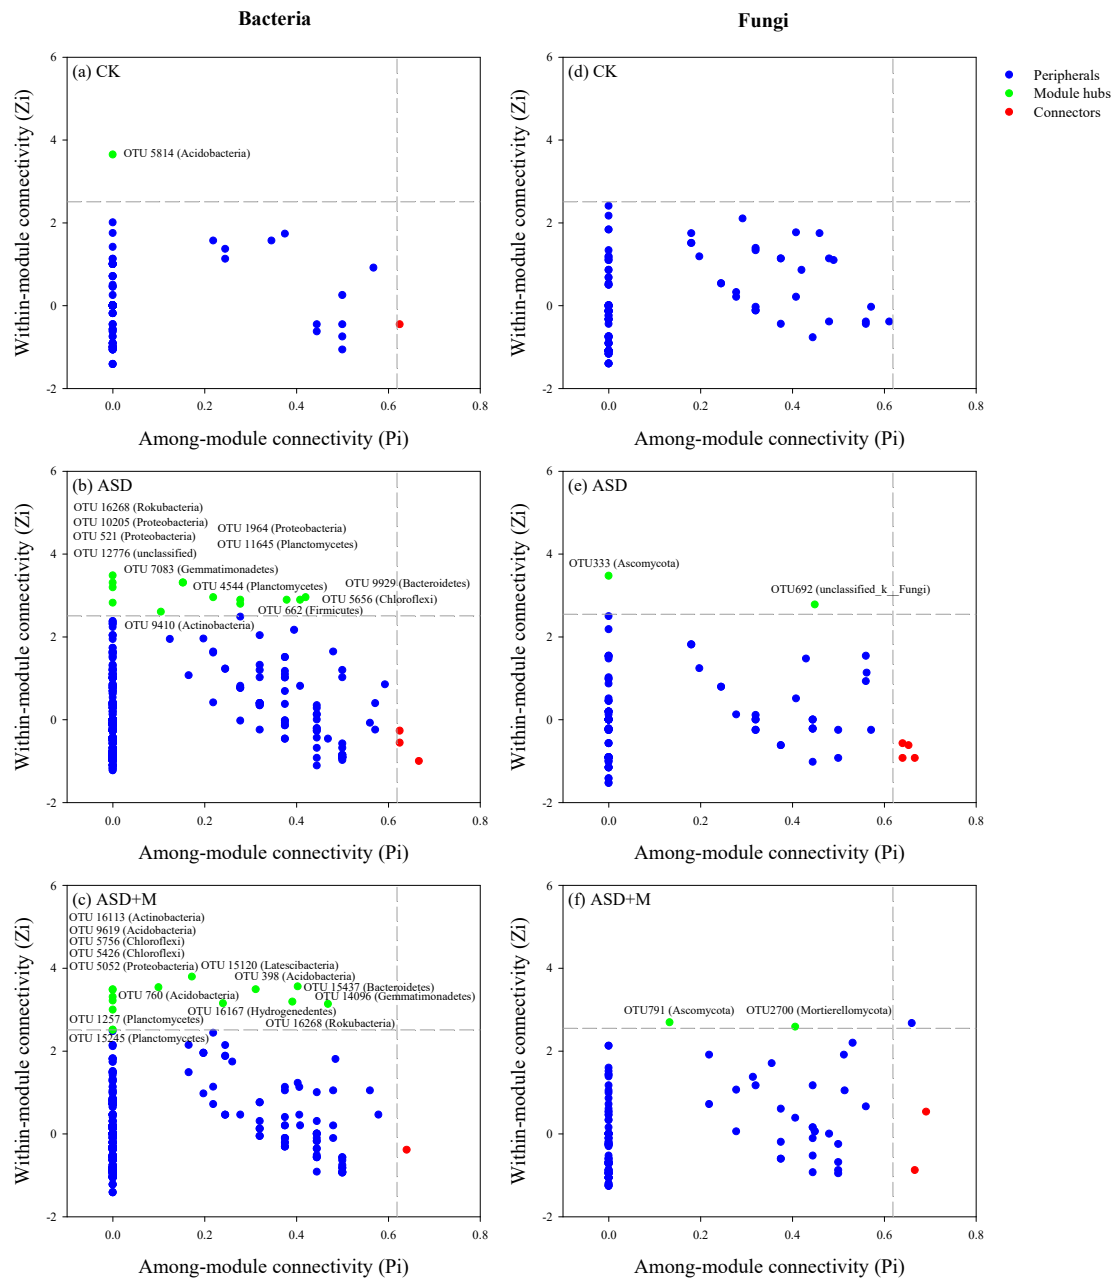

**Figure. S2** Z-P plot exhibiting the distribution of OTUs based on the topological roles (a-c:bacteria; d-f:fungi). Each point represents an OTU. The location of each OTUs determined according to the within-module connectivity ( $Z_i$ ) and among-module connectivity ( $P_i$ ). The module hub is defined according to  $Z_i$  and  $P_i$  values ( $Z_i > 2.5$ ,  $P_i \leq 0.62$ ). The four identified module hubs were marked with OTU numbers and its phylum.
